# Supplementary material
Source: PubMed Central journal article supplement (PMC7351026)
Supplement: ehp6785.s001.acco.pdf [file ehp6785.s001.acco.pdf]

**Note to readers with disabilities:** *EHP* strives to ensure that all journal content is accessible to all readers. However, some figures and Supplemental Material published in *EHP* articles may not conform to [508 standards](#) due to the complexity of the information being presented. If you need assistance accessing journal content, please contact [ehp508@niehs.nih.gov](mailto:ehp508@niehs.nih.gov). Our staff will work with you to assess and meet your accessibility needs within 3 working days.

### **Supplemental Material**

#### **Serum Half-Lives for Short- and Long-Chain Perfluoroalkyl Acids after Ceasing Exposure from Drinking Water Contaminated by Firefighting Foam**

Yiyi Xu, Tony Fletcher, Daniela Pineda, Christian H. Lindh, Carina Nilsson, Anders Glynn, Carolina Vogs, Karin Norström, Karl Lilja, Kristina Jakobsson, and Ying Li

#### **Table of Contents**

**Table S1.** Overview of the perfluoroalkyl substances (PFAS) analytes and internal standards.

**Table S2.** Selected reaction monitoring parameters for the quantifier transitions of PFAS and their internal standards.

**Table S3.** Limit of detection (LOD) for each PFAS in water, serum and urine samples.

**Table S4.** Concentrations and coefficient of variation in the quality control samples (QC) in serum analysis.

**Table S5.** Initial serum PFAS levels (ng/mL) for males and females from 26 airport employees.

**Table S6.** The concentration and relative composition of PFAS measured in drinking water and serum used for figure 1 (molar basis) and figure S1 (weight basis).

**Table S7.** Descriptive table of specific gravity adjusted urinary PFAS levels from 17 airport employees attending repeated sampling.

**Table S8.** Descriptive table of serum PFAS levels from 17 airport employees attending repeated sampling.

**Figure S1.** Composition (weight concentration basis) of perfluorinated carboxylic acid (PFCA, dotted bars) and perfluorinated sulfonic acid (PFSA, open bars; branched PFOS in hatched bar) in drinking water and in first serum samples obtained from 26 airport employees. PFCA and PFSA with same number of carbons in the carbon chain (i.e. PFHxA vs. PFHxS, PFHpA vs. PFHpS, and PFOA vs. PFOS) are illustrated with same color. Although PFBA and PFPeA were elevated in the drinking water, they were below LOD in all the serum samples, so they were not presented.

**Figure S2.** Box plot of specific gravity adjusted urinary concentration of PFHpA, PFOA, PFPeS, PFHxS L-PFOS and 2/6m-PFOS at each sampling. PFHxS showed higher concentration than the rest of the PFAS, thus note a different scale on y-axis. The descriptive data are listed in Table S7.

**Figure S3.** Pattern of change in urine/serum ratio of a) PFPeS and b) L-PFOS for each individual over four paired samplings.

Table S1. Overview of the perfluoroalkyl substances (PFAS) analytes and internal standards

| <b>Compounds</b>                                                          | <b>Abbreviations</b>                | <b>Molar weight</b> |
|---------------------------------------------------------------------------|-------------------------------------|---------------------|
| Perfluoropentanoic acid                                                   | PFPeA                               | 264.0               |
| Perfluorohexanoic acid                                                    | PFHxA                               | 314.0               |
| Perfluoroheptanoic acid                                                   | PFHpA                               | 364.1               |
| Perfluorooctanoic acid                                                    | PFOA                                | 414.1               |
| Perfluorononanoic acid                                                    | PFNA                                | 464.1               |
| Perfluorodecanoic acid                                                    | PFDA                                | 514.1               |
| Perfluoroundecanoic acid                                                  | PFUnDA                              | 564.1               |
| Perfluorododecanoic acid                                                  | PFDoDA                              | 614.1               |
| Perfluorobutane sulfonic acid                                             | PFBS                                | 300.1               |
| Perfluoropentane sulfonic acid                                            | PFPeS                               | 350.1               |
| Perfluorohexane sulfonic acid                                             | PFHxS                               | 400.1               |
| Perfluoroheptane sulfonic acid                                            | PFHpS                               | 450.1               |
| Perfluorooctane sulfonic acid                                             | L-PFOS                              | 500.1               |
| Perfluoro-1-methylheptanesulfonate                                        | 1m-PFOS                             | 500.1               |
| Perfluoro-2/6-methylheptanesulfonate ( $\Sigma$ )                         | 2/6m-PFOS <sup>a</sup>              | 500.1               |
| Perfluoro-3/4/5-methylheptanesulfonate ( $\Sigma$ )                       | 3/4/5m-PFOS <sup>b</sup>            | 500.1               |
| <b>Internal standard</b>                                                  |                                     |                     |
| Perfluoro-n-[1,2,3,4,6- <sup>13</sup> C <sub>5</sub> ] hexanoic acid      | <sup>13</sup> C <sub>5</sub> -PFHxA |                     |
| Perfluoro-n-[1,2,3,4- <sup>13</sup> C <sub>4</sub> ] heptanoic acid       | <sup>13</sup> C <sub>4</sub> -PFHpA |                     |
| Perfluoro-n-[ <sup>13</sup> C <sub>8</sub> ] octanoic acid                | <sup>13</sup> C <sub>8</sub> -PFOA  |                     |
| Sodium perfluoro-1-[2,3,4- <sup>13</sup> C <sub>3</sub> ] butanesulfonate | <sup>13</sup> C <sub>3</sub> -PFBS  |                     |
| Sodium perfluoro-1-[1,2,3- <sup>13</sup> C <sub>3</sub> ] hexanesulfonate | <sup>13</sup> C <sub>3</sub> -PFHxS |                     |
| Sodium perfluoro-1-[ <sup>13</sup> C <sub>8</sub> ] octanesulfonate       | <sup>13</sup> C <sub>4</sub> -PFOS  |                     |

<sup>a</sup> 2/6m-PFOS corresponds to the sum of 2m-PFOS and 6m-PFOS.

<sup>b</sup> 3/4/5m-PFOS corresponds to the sum of 3m-PFOS, 4m-PFOS and 5m-PFOS.

Table S2. Selected reaction monitoring parameters for the quantifier transitions of PFAS and their internal standards

| PFAS        | Transition | Collision energy (V) | DP(V) | Internal standard                    | Transition | Collision energy (V) | DP (V) |
|-------------|------------|----------------------|-------|--------------------------------------|------------|----------------------|--------|
| PFPeA       | 263/219    | -13                  | -25   | <sup>13</sup> C <sub>5</sub> -PFPeA  | 268/223    | -13                  | -25    |
| PFHxA       | 313/269    | -14                  | -30   | <sup>13</sup> C <sub>5</sub> -PFHxA  | 318/273    | -14                  | -25    |
| PFHpA       | 363/169    | -26                  | -25   | <sup>13</sup> C <sub>4</sub> -PFHpA  | 367/322    | -26                  | -25    |
| PFOA        | 413/369    | -16                  | -25   | <sup>13</sup> C <sub>8</sub> -PFOA   | 421/376    | -16                  | -25    |
| PFNA        | 463/419    | -15                  | -40   | <sup>13</sup> C <sub>9</sub> -PFNA   | 472/427    | -15                  | -25    |
| PFDA        | 513/469    | -16                  | -25   | <sup>13</sup> C <sub>6</sub> -PFDA   | 519/474    | -16                  | -25    |
| PFUnDA      | 563/519    | -15                  | -40   | <sup>13</sup> C <sub>7</sub> -PFUnDA | 570/525    | -15                  | -25    |
| PFDoDA      | 613/569    | -20                  | -25   | <sup>13</sup> C <sub>2</sub> -PFDoDA | 615/570    | -20                  | -25    |
| PFBS        | 299/99     | -35                  | -100  | <sup>13</sup> C <sub>3</sub> -PFBS   | 302/99     | -35                  | -100   |
| PFPeS       | 349/80     | -80                  | -150  |                                      |            |                      |        |
| PFHxS       | 399/80     | -90                  | -130  | <sup>13</sup> C <sub>3</sub> -PFHxS  | 402/99     | -80                  | -130   |
| PFHpS       | 449/99     | -100                 | -150  |                                      |            |                      |        |
| L-PFOS      | 499/99.3   | -95                  | -150  | <sup>13</sup> C <sub>8</sub> -PFOS   | 507/99     | -95                  | -150   |
| 1m-PFOS     | 499/419    | -40                  | -150  |                                      |            |                      |        |
| 3/4/5m-PFOS | 499/80     | -120                 | -150  |                                      |            |                      |        |
| 2/6m-PFOS   | 499/169    | -40                  | -150  |                                      |            |                      |        |

Note: PFAS abbreviations see Table S1.

Table S3. Limit of detection (LOD) for each PFAS in water, serum and urine samples

| Compounds                      |         | LOD<br>Water (ng/L) | LOD<br>Serum (ng/ml) | LOD<br>Urine (ng/ml) |
|--------------------------------|---------|---------------------|----------------------|----------------------|
| PFCA                           | PFBA    | 0.6                 | NA <sup>a</sup>      | NA                   |
|                                | PFPeA   | 0.6                 | 0.08                 | NA                   |
|                                | PFHxA   | 0.3                 | 0.07                 | 0.1 <sup>b</sup>     |
|                                | PFHpA   | 0.3                 | 0.05                 | 0.01                 |
|                                | PFOA    | 0.3                 | 0.09                 | 0.01                 |
|                                | PFNA    | 0.6                 | 0.05                 | NA                   |
|                                | PFDA    | 0.6                 | 0.09                 | NA                   |
|                                | PFUnDA  | 2                   | 0.1                  | NA                   |
|                                | PFDoDA  | 2                   | 0.2                  | NA                   |
|                                | PFSA    | PFBS                | 0.3                  | 0.05                 |
| PFPeS                          |         | 0.3                 | 0.02                 | 0.01                 |
| PFHxS                          |         | 0.3                 | 0.1                  | 0.01                 |
| PFHpS                          |         | 0.3                 | 0.1                  | 0.01 <sup>b</sup>    |
| L-PFOS                         |         | 0.2                 | 0.2                  | 0.01                 |
| 1m-PFOS                        |         | NA <sup>a</sup>     | 0.05                 | 0.01                 |
| 3/4/5m-PFOS                    |         | NA                  | 0.01                 | 0.02                 |
| 2/6m-PFOS                      |         | NA                  | 0.3                  | 0.02                 |
| Fluorotelomer<br>sulfonic-acid | 6:2 FTS | 0.3                 | NA                   | NA                   |

Note: PFCA, perfluorinated carboxylic acid; PFSA, perfluorinated sulfonic acid. PFBA, perfluorobutanoic acid; 6:2 FTS, fluorotelomer sulfonic acid. Other PFAS abbreviations see Table S1.

<sup>a</sup> Not measured in samples.

<sup>b</sup> Estimated from urine matrix.

Table S4. Concentrations and coefficient of variation in the quality control samples (QC) in serum analysis

| Compounds   | QC1 <sup>a</sup>         |                  | QC2 <sup>a</sup>         |                  | QC3 <sup>b</sup>         |                  |
|-------------|--------------------------|------------------|--------------------------|------------------|--------------------------|------------------|
|             | concentration<br>(ng/ml) | Precision<br>(%) | concentration<br>(ng/ml) | Precision<br>(%) | concentration<br>(ng/ml) | Precision<br>(%) |
| PFPeA       | <LOD <sup>c</sup>        |                  | <LOD                     |                  | 110                      | 5                |
| PFHxA       | 0.39                     | 36               | 0.36                     | 36               | 110                      | 5                |
| PFHpA       | <LOD                     |                  | <LOD                     |                  | 100                      | 7                |
| PFOA        | 1.3                      | 7                | 1.6                      | 9                | 110                      | 6                |
| PFNA        | 1.1                      | 7                | 1.0                      | 8                | 110                      | 6                |
| PFDA        | 0.30                     | 13               | 0.29                     | 12               | 110                      | 7                |
| PFUnDA      | 0.46                     | 9                | 0.45                     | 12               | 110                      | 6                |
| PFDoDA      | <LOD                     |                  | <LOD                     |                  | 110                      | 6                |
| PFBS        | <LOD                     |                  | <LOD                     |                  | 100                      | 7                |
| PFPeS       | 0.13                     | 17               | 0.22                     | 19               | 0.05                     | 40               |
| PFHxS       | 8.3                      | 7                | 14                       | 8                | 110                      | 5                |
| PFHpS       | 0.39                     | 14               | 0.67                     | 22               | 0.28                     | 17               |
| L-PFOS      | 6.6                      | 8                | 9.8                      | 10               | 110                      | 5                |
| 1m-PFOS     | 1.3                      | 14               | 0.33                     | 19               | 0.79                     | 15               |
| 3/4/5m-PFOS | 3.8                      | 20               | 2.2                      | 14               | 2.5                      | 14               |
| 2/6m-PFOS   | 1.5                      | 20               | 2.5                      | 16               | 1.4                      | 20               |

Note: PFAS abbreviations see Table S1. LOD, limit of detection.

<sup>a</sup> QC1 and QC2 were prepared in-house by pooling equal volumes of serum samples containing different levels of PFAS.

<sup>b</sup> QC3 was prepared with additional spiking with PFAS standard solutions.

<sup>c</sup> LOD are listed in table S3.

Table S5. Initial serum PFAS levels (ng/mL) for males and females from 26 airport employees

|                                          | PFAS               | Males<br>(N=19)   |        |     | Females<br>(N=7) |        |      | Difference between sexes |
|------------------------------------------|--------------------|-------------------|--------|-----|------------------|--------|------|--------------------------|
|                                          |                    | Min               | Median | Max | min              | median | max  | p-values <sup>a</sup>    |
| Perfluorinated carboxylic-acid<br>(PFCA) | <b>PFHxA</b>       | 0.16              | 0.42   | 1.1 | 0.19             | 0.24   | 0.54 | 0.015                    |
|                                          | <b>PFHpA</b>       | 0.07              | 0.45   | 2.0 | 0.08             | 0.46   | 2.2  | 0.90                     |
|                                          | <b>PFOA</b>        | 2.9               | 11     | 31  | 5.0              | 6.7    | 20   | 0.40                     |
| Perfluorinated sulfonic-acid<br>(PFSA)   | <b>PFBS</b>        | <LOD <sup>b</sup> | 0.32   | 1.1 | 0.06             | 0.39   | 1.3  | 0.78                     |
|                                          | <b>PFPeS</b>       | 1.4               | 7.2    | 17  | 3.5              | 5.1    | 15   | 0.40                     |
|                                          | <b>PFHxS</b>       | 17                | 78     | 402 | 21               | 74     | 183  | 0.61                     |
|                                          | <b>PFHpS</b>       | 0.28              | 1.4    | 6.2 | 0.49             | 1.1    | 2.2  | 0.28                     |
|                                          | <b>L-PFOS</b>      | 5.4               | 10     | 28  | 5.5              | 9.3    | 13   | 0.40                     |
|                                          | <b>1m-PFOS</b>     | 0.25              | 1.1    | 4.1 | 0.39             | 0.58   | 1.1  | 0.31                     |
|                                          | <b>3/4/5m-PFOS</b> | 1.2               | 4.9    | 17  | 1.7              | 2.9    | 5.4  | 0.15                     |
|                                          | <b>2/6m-PFOS</b>   | 0.84              | 2.5    | 7.5 | 1.0              | 1.4    | 2.8  | 0.094                    |

Note: PFAS abbreviations see Table S1.

<sup>a</sup> p values were derived from Mann-Whitney U Test comparing males and females.

<sup>b</sup> LOD are listed in table S3.

Table S6. The concentration and relative composition of PFAS measured in drinking water and serum used for figure 1 (molar basis) and figure S1 (weight basis)

| PFAS            | Molar basis                                                       |                                                               | Weight basis                                                      |                                                               |
|-----------------|-------------------------------------------------------------------|---------------------------------------------------------------|-------------------------------------------------------------------|---------------------------------------------------------------|
|                 | Airport drinking water<br>concentration<br>(relative composition) | Serum <sup>a</sup><br>concentration<br>(relative composition) | Airport drinking water<br>concentration<br>(relative composition) | Serum <sup>a</sup><br>concentration<br>(relative composition) |
| PFHxA           | 1.05 (19.9%)                                                      | 0.0012 (0.4%)                                                 | 330 (16.8%)                                                       | 0.38 (0.3%)                                                   |
| PFHpA           | 0.27 (5.0%)                                                       | 0.0013 (0.5%)                                                 | 97 (5.0%)                                                         | 0.46 (0.4%)                                                   |
| PFOA            | 0.72 (13.7%)                                                      | 0.022 (8.1%)                                                  | 300 (15.3%)                                                       | 9.1 (8.2%)                                                    |
| PFBS            | 0.67 (12.6%)                                                      | 0.0011 (0.4%)                                                 | 200 (10.2%)                                                       | 0.33 (0.3%)                                                   |
| PFPeS           | 0.51 (9.7%)                                                       | 0.020 (7.3%)                                                  | 180 (9.2%)                                                        | 6.9 (6.3%)                                                    |
| PFHxS           | 1.77 (33.6%)                                                      | 0.19 (70.4%)                                                  | 710 (36.2%)                                                       | 76 (68.9%)                                                    |
| PFHpS           | 0.036 (0.7%)                                                      | 0.0029 (1.1 %)                                                | 16 (0.8%)                                                         | 1.3 (1.2%)                                                    |
| PFOS (linear)   | 0.12 (2.3%)                                                       | 0.019 (7.0%)                                                  | 62 (3.2%)                                                         | 9.5 (8.6%)                                                    |
| PFOS (branched) | 0.13 (2.4%)                                                       | 0.013 (4.7%)                                                  | 64 (3.3%)                                                         | 6.4 (5.8%)                                                    |
| total           | 5.28 (100%)                                                       | 0.27 (100%)                                                   | 1959 (100%)                                                       | 110 (100%)                                                    |

Note: PFAS abbreviations see Table S1.

a. Serum concentration was the median level observed in the first serum samples from all 26 airport employees.



Table S7. Descriptive table of specific gravity adjusted urinary PFAS levels from 17 airport employees attending repeated sampling

| PFAS      | Sampling date                             | Specific gravity adjusted urinary level (ng/mL) |                   |               |        |               |      |
|-----------|-------------------------------------------|-------------------------------------------------|-------------------|---------------|--------|---------------|------|
|           |                                           | count                                           | Min               | 25 percentile | Median | 75 percentile | Max  |
| PFHpA     | 2 <sup>nd</sup> sampling (October 2018)   | 17                                              | <LOD <sup>a</sup> | 0.02          | 0.03   | 0.04          | 0.05 |
|           | 3 <sup>rd</sup> sampling (November, 2018) | 16                                              | <LOD              | 0.01          | 0.02   | 0.03          | 0.08 |
|           | 4 <sup>th</sup> sampling (December 2018)  | 14                                              | <LOD              | 0.01          | 0.02   | 0.03          | 0.06 |
|           | 5 <sup>th</sup> sampling (January 2019)   | 12                                              | <LOD              | <LOD          | 0.02   | 0.03          | 0.06 |
|           |                                           |                                                 |                   |               |        |               |      |
| PFOA      | 2 <sup>nd</sup> sampling (October 2018)   | 17                                              | 0.01              | 0.02          | 0.03   | 0.04          | 0.07 |
|           | 3 <sup>rd</sup> sampling (November, 2018) | 16                                              | 0.01              | 0.02          | 0.03   | 0.04          | 0.07 |
|           | 4 <sup>th</sup> sampling (December 2018)  | 14                                              | 0.01              | 0.02          | 0.04   | 0.05          | 0.13 |
|           | 5 <sup>th</sup> sampling (January 2019)   | 12                                              | 0.02              | 0.03          | 0.03   | 0.04          | 0.07 |
|           |                                           |                                                 |                   |               |        |               |      |
| PFPeS     | 2 <sup>nd</sup> sampling (October 2018)   | 17                                              | 0.04              | 0.06          | 0.07   | 0.08          | 0.11 |
|           | 3 <sup>rd</sup> sampling (November, 2018) | 16                                              | 0.02              | 0.05          | 0.07   | 0.09          | 0.12 |
|           | 4 <sup>th</sup> sampling (December 2018)  | 14                                              | 0.03              | 0.07          | 0.08   | 0.08          | 0.12 |
|           | 5 <sup>th</sup> sampling (January 2019)   | 12                                              | 0.05              | 0.06          | 0.07   | 0.08          | 0.09 |
|           |                                           |                                                 |                   |               |        |               |      |
| PFHxS     | 2 <sup>nd</sup> sampling (October 2018)   | 17                                              | 0.03              | 0.06          | 0.09   | 0.13          | 0.28 |
|           | 3 <sup>rd</sup> sampling (November, 2018) | 16                                              | 0.03              | 0.05          | 0.07   | 0.13          | 0.26 |
|           | 4 <sup>th</sup> sampling (December 2018)  | 14                                              | 0.04              | 0.05          | 0.12   | 0.17          | 0.73 |
|           | 5 <sup>th</sup> sampling (January 2019)   | 12                                              | 0.06              | 0.07          | 0.08   | 0.11          | 0.31 |
|           |                                           |                                                 |                   |               |        |               |      |
| L-PFOS    | 2 <sup>nd</sup> sampling (October 2018)   | 17                                              | <LOD              | <LOD          | <LOD   | 0.01          | 0.08 |
|           | 3 <sup>rd</sup> sampling (November, 2018) | 16                                              | <LOD              | <LOD          | 0.01   | 0.02          | 0.03 |
|           | 4 <sup>th</sup> sampling (December 2018)  | 14                                              | <LOD              | <LOD          | <LOD   | 0.02          | 0.05 |
|           | 5 <sup>th</sup> sampling (January 2019)   | 12                                              | <LOD              | <LOD          | <LOD   | 0.01          | 0.04 |
|           |                                           |                                                 |                   |               |        |               |      |
| 2/6m-PFOS | 2 <sup>nd</sup> sampling (October 2018)   | 17                                              | <LOD              | <LOD          | <LOD   | <LOD          | <LOD |
|           | 3 <sup>rd</sup> sampling (November, 2018) | 16                                              | <LOD              | <LOD          | <LOD   | <LOD          | 0.04 |
|           | 4 <sup>th</sup> sampling (December 2018)  | 14                                              | <LOD              | <LOD          | <LOD   | <LOD          | 1.60 |
|           | 5 <sup>th</sup> sampling (January 2019)   | 12                                              | <LOD              | <LOD          | <LOD   | <LOD          | 0.03 |
|           |                                           |                                                 |                   |               |        |               |      |

Note: PFAS abbreviations see Table S1.

<sup>a</sup> LOD are listed in table S3.

Table S8: Descriptive table of serum PFAS levels from 17 airport employees attending repeated sampling

|       |                                           | Count | Min               | 25 percentile | Median | 75 percentile | Max  |
|-------|-------------------------------------------|-------|-------------------|---------------|--------|---------------|------|
| PFHxA | 1 <sup>st</sup> sampling (September 2018) | 17    | 0.16              | 0.24          | 0.37   | 0.48          | 0.92 |
|       | 2 <sup>nd</sup> sampling (October 2018)   | 17    | 0.14              | 0.26          | 0.31   | 0.51          | 1.2  |
|       | 3 <sup>rd</sup> sampling (November, 2018) | 17    | 0.13              | 0.27          | 0.34   | 0.56          | 1.4  |
|       | 4 <sup>th</sup> sampling (December 2018)  | 16    | 0.08              | 0.22          | 0.30   | 0.46          | 0.87 |
|       | 5 <sup>th</sup> sampling (January 2019)   | 16    | 0.11              | 0.21          | 0.33   | 0.52          | 1.2  |
| PFHpA | 1 <sup>st</sup> sampling (September 2018) | 17    | 0.20              | 0.45          | 0.53   | 1.1           | 2.2  |
|       | 2 <sup>nd</sup> sampling (October 2018)   | 17    | 0.07              | 0.18          | 0.33   | 0.83          | 2.0  |
|       | 3 <sup>rd</sup> sampling (November, 2018) | 17    | 0.08              | 0.09          | 0.27   | 0.75          | 2.0  |
|       | 4 <sup>th</sup> sampling (December 2018)  | 16    | 0.05              | 0.09          | 0.15   | 0.72          | 1.8  |
|       | 5 <sup>th</sup> sampling (January 2019)   | 16    | <LOD <sup>a</sup> | <LOD          | 0.10   | 0.50          | 1.4  |
| PFOA  | 1 <sup>st</sup> sampling (September 2018) | 17    | 5.0               | 8.7           | 13     | 16            | 31   |
|       | 2 <sup>nd</sup> sampling (October 2018)   | 17    | 4.1               | 8.3           | 11     | 14            | 28   |
|       | 3 <sup>rd</sup> sampling (November, 2018) | 17    | 4.6               | 7.9           | 11     | 14            | 28   |
|       | 4 <sup>th</sup> sampling (December 2018)  | 16    | 4.3               | 7.5           | 10     | 13            | 27   |
|       | 5 <sup>th</sup> sampling (January 2019)   | 16    | 4.4               | 8.0           | 10     | 14            | 27   |
| PFBS  | 1 <sup>st</sup> sampling (September 2018) | 17    | 0.22              | 0.32          | 0.46   | 0.68          | 1.3  |
|       | 2 <sup>nd</sup> sampling (October 2018)   | 17    | <LOD              | 0.11          | 0.17   | 0.31          | 0.70 |
|       | 3 <sup>rd</sup> sampling (November, 2018) | 17    | <LOD              | <LOD          | 0.09   | 0.28          | 0.65 |
|       | 4 <sup>th</sup> sampling (December 2018)  | 16    | <LOD              | <LOD          | 0.08   | 0.24          | 0.52 |
|       | 5 <sup>th</sup> sampling (January 2019)   | 16    | <LOD              | <LOD          | 0.06   | 0.11          | 0.30 |
| PFPeS | 1 <sup>st</sup> sampling (September 2018) | 17    | 3.6               | 5.8           | 7.6    | 13            | 17   |
|       | 2 <sup>nd</sup> sampling (October 2018)   | 17    | 2.3               | 4.9           | 6.8    | 11            | 14   |
|       | 3 <sup>rd</sup> sampling (November, 2018) | 17    | 2.1               | 4.4           | 6.3    | 11            | 14   |
|       | 4 <sup>th</sup> sampling (December 2018)  | 16    | 1.8               | 4.0           | 6.5    | 11            | 14   |
|       | 5 <sup>th</sup> sampling (January 2019)   | 16    | 1.9               | 4.4           | 6.2    | 9.9           | 13   |
| PFHxS | 1 <sup>st</sup> sampling (September 2018) | 17    | 21                | 63            | 133    | 155           | 402  |
|       | 2 <sup>nd</sup> sampling (October 2018)   | 17    | 18                | 57            | 122    | 144           | 363  |
|       | 3 <sup>rd</sup> sampling (November, 2018) | 17    | 20                | 57            | 119    | 150           | 392  |

|                    |                                           |    |      |      |      |     |     |
|--------------------|-------------------------------------------|----|------|------|------|-----|-----|
|                    | 4 <sup>th</sup> sampling (December 2018)  | 16 | 17   | 50   | 109  | 146 | 381 |
|                    | 5 <sup>th</sup> sampling (January 2019)   | 16 | 42   | 64   | 117  | 153 | 399 |
| PFH <sub>2</sub> S | 1 <sup>st</sup> sampling (September 2018) | 17 | 0.49 | 0.96 | 1.6  | 2.5 | 6.2 |
|                    | 2 <sup>nd</sup> sampling (October 2018)   | 17 | 0.45 | 0.95 | 1.5  | 2.1 | 6.1 |
|                    | 3 <sup>rd</sup> sampling (November, 2018) | 17 | 0.47 | 0.94 | 1.4  | 1.9 | 6.3 |
|                    | 4 <sup>th</sup> sampling (December 2018)  | 16 | 0.35 | 0.93 | 1.5  | 2.1 | 5.9 |
|                    | 5 <sup>th</sup> sampling (January 2019)   | 16 | 0.45 | 1.1  | 1.5  | 2.2 | 6.2 |
| L-PFOS             | 1 <sup>st</sup> sampling (September 2018) | 17 | 5.5  | 7.7  | 11   | 15  | 28  |
|                    | 2 <sup>nd</sup> sampling (October 2018)   | 17 | 4.1  | 7.6  | 10   | 16  | 24  |
|                    | 3 <sup>rd</sup> sampling (November, 2018) | 17 | 4.7  | 7.3  | 11   | 16  | 23  |
|                    | 4 <sup>th</sup> sampling (December 2018)  | 16 | 4.4  | 7.4  | 9.8  | 14  | 24  |
|                    | 5 <sup>th</sup> sampling (January 2019)   | 16 | 4.5  | 9.1  | 10   | 16  | 23  |
| 1m-PFOS            | 1 <sup>st</sup> sampling (September 2018) | 17 | 0.32 | 0.48 | 1.0  | 1.8 | 4.1 |
|                    | 2 <sup>nd</sup> sampling (October 2018)   | 17 | 0.26 | 0.54 | 0.89 | 1.4 | 4.0 |
|                    | 3 <sup>rd</sup> sampling (November, 2018) | 17 | 0.24 | 0.54 | 0.88 | 1.5 | 4.4 |
|                    | 4 <sup>th</sup> sampling (December 2018)  | 16 | 0.24 | 0.47 | 0.91 | 1.3 | 4.3 |
|                    | 5 <sup>th</sup> sampling (January 2019)   | 16 | 0.26 | 0.51 | 0.97 | 1.3 | 4.5 |
| 3/4/5m-PFOS        | 1 <sup>st</sup> sampling (September 2018) | 17 | 1.7  | 2.7  | 4.9  | 6.3 | 17  |
|                    | 2 <sup>nd</sup> sampling (October 2018)   | 17 | 1.3  | 2.4  | 4.1  | 4.8 | 15  |
|                    | 3 <sup>rd</sup> sampling (November, 2018) | 17 | 1.0  | 2.5  | 4.2  | 5.1 | 16  |
|                    | 4 <sup>th</sup> sampling (December 2018)  | 16 | 1.0  | 2.1  | 3.6  | 4.9 | 16  |
|                    | 5 <sup>th</sup> sampling (January 2019)   | 16 | 1.0  | 2.7  | 4.0  | 4.9 | 16  |
| 2/6m-PFOS          | 1 <sup>st</sup> sampling (September 2018) | 17 | 1.0  | 1.4  | 2.6  | 3.6 | 7.5 |
|                    | 2 <sup>nd</sup> sampling (October 2018)   | 17 | 0.97 | 1.5  | 2.2  | 2.8 | 7.2 |
|                    | 3 <sup>rd</sup> sampling (November, 2018) | 17 | 0.66 | 1.3  | 2.3  | 3.5 | 8.1 |
|                    | 4 <sup>th</sup> sampling (December 2018)  | 16 | 0.57 | 0.96 | 1.9  | 2.9 | 7.1 |
|                    | 5 <sup>th</sup> sampling (January 2019)   | 16 | 0.83 | 1.2  | 2.1  | 2.7 | 7.0 |

Note: PFAS abbreviations see Table S1.

<sup>a</sup> LOD are listed in table S3.

## Supplementary Figures:

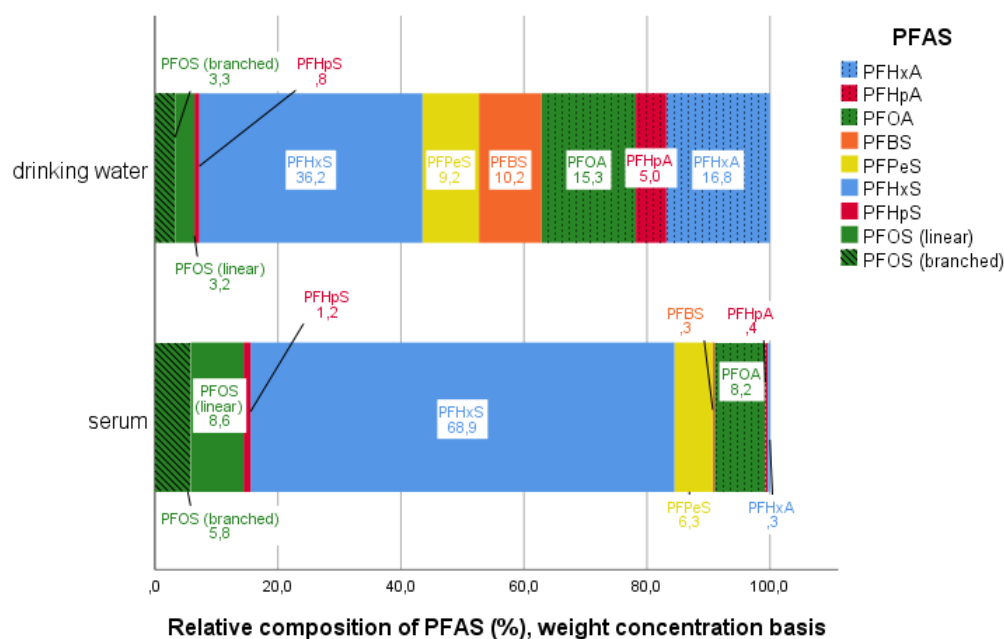

Figure S1: Composition (weight concentration basis) of perfluorinated carboxylic acid (PFCA, dotted bars) and perfluorinated sulfonic acid (PFSA, open bars; branched PFOS in hatched bar) in drinking water and in first serum samples obtained from 26 airport employees. PFCA and PFSA with same number of carbons in the carbon chain (i.e. PFHxA vs. PFHxS, PFHpA vs. PFHpS, and PFOA vs. PFOS) are illustrated with same color. Although PFBA and PFPeA were elevated in the drinking water, they were below LOD in all the serum samples, so they were not presented.

Note: PFAS abbreviations see Table S1.

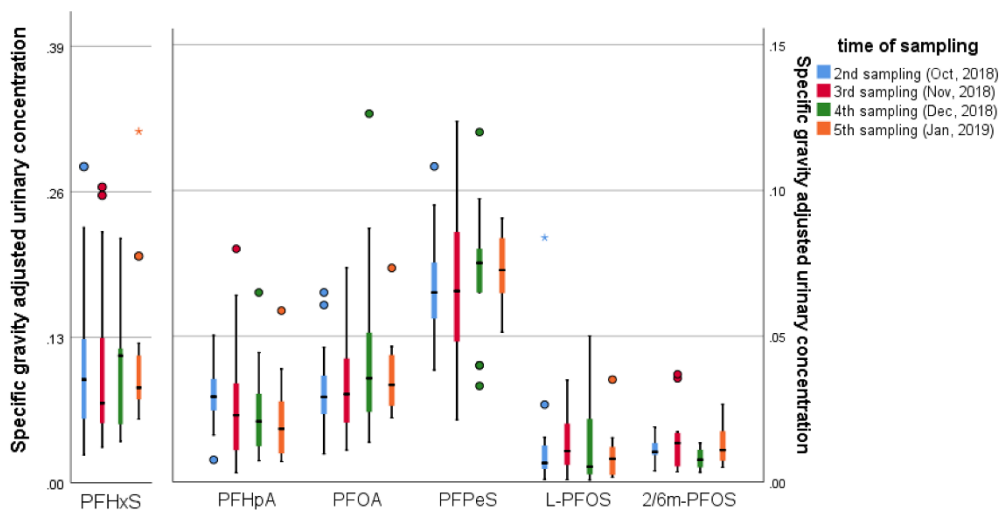

Figure S2: Box plot of specific gravity adjusted urinary concentration of PFHpA, PFOA, PFPeS, PFHxS L-PFOS and 2/6m-PFOS at each sampling. PFHxS showed higher concentration than the rest of the PFAS, thus note a different scale on y-axis. The descriptive data are listed in Table S7.

Note: PFAS abbreviations see Table S1.

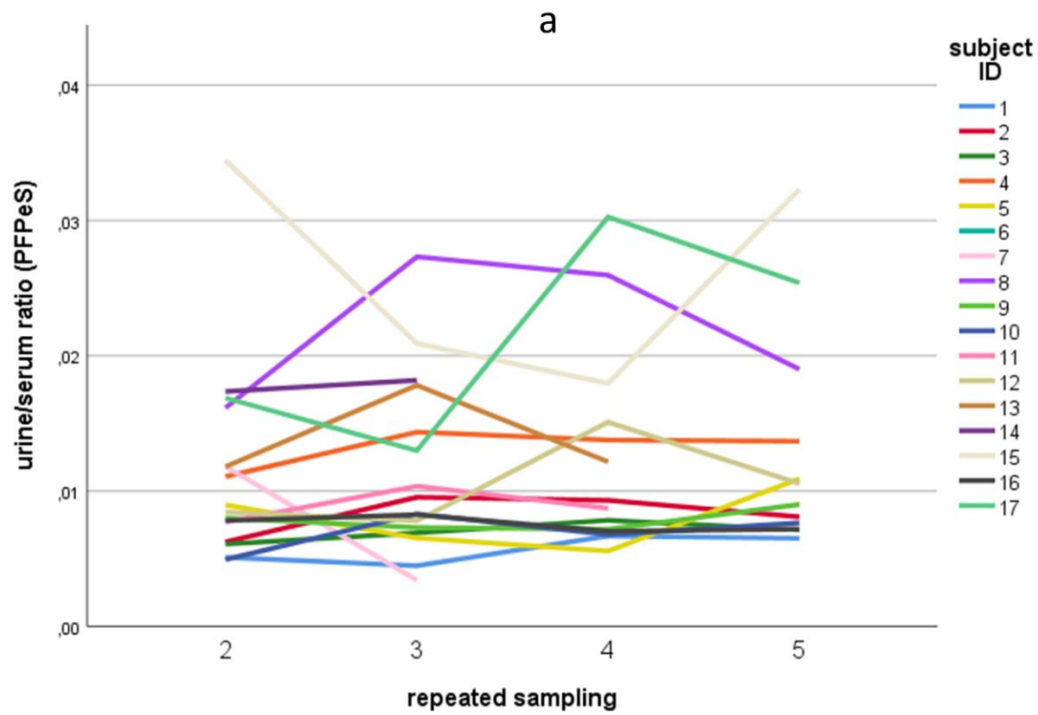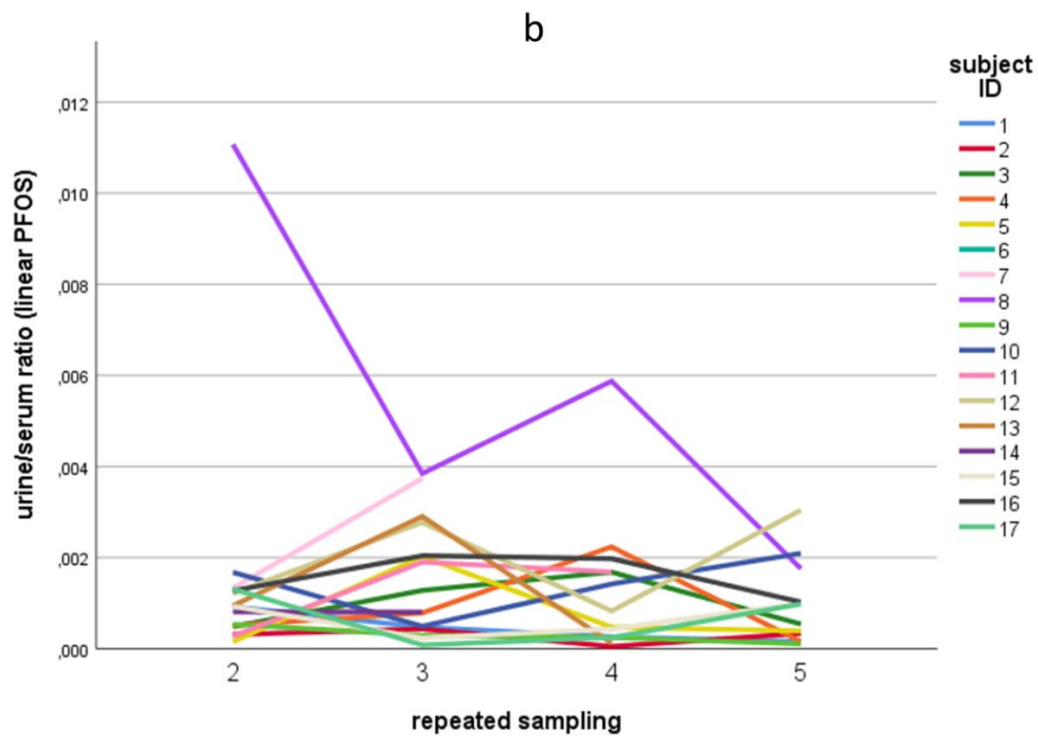

Figure S3: Pattern of change in urine/serum ratio of a) PFPeS and b) L-PFOS for each individual over four paired samplings.

Note: PFAS abbreviations see Table S1.
