# Supplementary material
Source: PubMed Central journal article supplement (PMC7351026)
Supplement: ehp6785.smcontents.508.pdf [file ehp6785.smcontents.508.pdf]

**Note to readers with disabilities:** *EHP* strives to ensure that all journal content is accessible to all readers. However, some figures and Supplemental Material published in *EHP* articles may not conform to [508 standards](#) due to the complexity of the information being presented. If you need assistance accessing journal content, please contact [ehp508@niehs.nih.gov](mailto:ehp508@niehs.nih.gov). Our staff will work with you to assess and meet your accessibility needs within 3 working days.

### **Supplemental Material**

#### **Serum Half-Lives for Short- and Long-Chain Perfluoroalkyl Acids after Ceasing Exposure from Drinking Water Contaminated by Firefighting Foam**

Yiyi Xu, Tony Fletcher, Daniela Pineda, Christian H. Lindh, Carina Nilsson, Anders Glynn, Carolina Vogs, Karin Norström, Karl Lilja, Kristina Jakobsson, and Ying Li

#### **Table of Contents**

**Table S1.** Overview of the perfluoroalkyl substances (PFAS) analytes and internal standards.

**Table S2.** Selected reaction monitoring parameters for the quantifier transitions of PFAS and their internal standards.

**Table S3.** Limit of detection (LOD) for each PFAS in water, serum and urine samples.

**Table S4.** Concentrations and coefficient of variation in the quality control samples (QC) in serum analysis.

**Table S5.** Initial serum PFAS levels (ng/mL) for males and females from 26 airport employees.

**Table S6.** The concentration and relative composition of PFAS measured in drinking water and serum used for figure 1 (molar basis) and figure S1 (weight basis).

**Table S7.** Descriptive table of specific gravity adjusted urinary PFAS levels from 17 airport employees attending repeated sampling.

**Table S8.** Descriptive table of serum PFAS levels from 17 airport employees attending repeated sampling.

**Figure S1.** Composition (weight concentration basis) of perfluorinated carboxylic acid (PFCA, dotted bars) and perfluorinated sulfonic acid (PFSA, open bars; branched PFOS in hatched bar) in drinking water and in first serum samples obtained from 26 airport employees. PFCA and PFSA with same number of carbons in the carbon chain (i.e. PFHxA vs. PFHxS, PFHpA vs. PFHpS, and PFOA vs. PFOS) are illustrated with same color. Although PFBA and PFPeA were elevated in the drinking water, they were below LOD in all the serum samples, so they were not presented.

**Figure S2.** Box plot of specific gravity adjusted urinary concentration of PFHpA, PFOA, PFPeS, PFHxS L-PFOS and 2/6m-PFOS at each sampling. PFHxS showed higher concentration than the rest of the PFAS, thus note a different scale on y-axis. The descriptive data are listed in Table S7.

**Figure S3.** Pattern of change in urine/serum ratio of a) PFPeS and b) L-PFOS for each individual over four paired samplings.
